# Supplementary material for: The GENOMES UNCOUPLED1 protein has an ancient, highly conserved role but not in retrograde signalling
Source: PubMed Central journal article supplement — New Phytol. 2022 Jul 5;236(1):99–113. doi: 10.1111/nph.18318 (PMC9545484; doi:10.1111/nph.18318), 2022-07-05
Supplement: NPH-236-99-s006.pdf [file NPH-236-99-s006.pdf]

Supporting information Tables S1-S5 and Notes S1 are provided as separate files. Supporting Figures S1-S7 and methods S1-S2 are provided here.

**Article title: The GENOMES UNCOUPLED1 protein has an ancient, highly conserved role but not in retrograde signalling**

Authors: Suvi Honkanen<sup>1</sup>, Ian Small<sup>1\*</sup>

<sup>1</sup> Australian Research Council Centre of Excellence in Plant Energy Biology, School of Molecular Sciences, The University of Western Australia, Crawley 6009, Australia

\* corresponding author, tel: +61 8 6488 4499, email: [ian.small@uwa.edu.au](mailto:ian.small@uwa.edu.au)

Acceptance date: 7 June 2022

**The following Supporting Information is available for this article:**

**Table S1** List of primers used in this study.

**Table S2** Identification of GUN1 sequences by hmmsearch scores. The following columns were obtained from the 1KP data (Carpenter *et al.*, 2019; Leebens-Mack *et al.*, 2019): Species, Sample (1KP sample name), Clade, Order, Family, Tissue type (tissue from which RNA was extracted), Contamination (assessment of contamination by 1KP analysis). The following columns use data from Gutmann *et al.*, 2020 : Target (ORF id number), Numprot (estimate of the number of distinct proteins encoded in the transcriptome of this sample), Tlen (target sequence length). These columns report new data from this manuscript: Fullscore (sum of scores of all alignments of this target to the GUN1 HMM), Domscore (maximum score of any alignment of this target to the GUN1 HMM), Hmfrom (position within the HMM at which the alignment to the target begins), Hmto (position within the HMM at which the alignment to the target stops), Alen (alignment length) and hasGUN1 (our interpretation of the scores, true if domscore > alen + 10). The code and source data for reproducing Table S2 are obtainable from Dryad (<https://doi.org/10.5061/dryad.x0k6djhmk>).

**Table S3** Differentially expressed transcripts in wild type and *Mpgun1* mutant spores grown in the presence or absence of spectinomycin. Differential expression analyses were carried

out using DESeq2 (Love *et al.*, 2014). Functional annotations for MpTak\_v5.1 genome release were used to annotate differentially expressed genes ( $\log_2$  fold-change  $>1$  or  $<-1$  and  $\text{padj} < 0.01$ ). The code and source data for reproducing Table S3 are obtainable from Dryad (<https://doi.org/10.5061/dryad.x0k6djhmk>).

**Table S4** Gene ontology (GO) term enrichment analysis of wild type and *Mpgun1* spores grown in the presence or absence of spectinomycin. Gene Ontology (GO) enrichment analyses were performed on the Dicots Plaza 4.5 platform (Van Bel *et al.*, 2018) using standard settings with differentially expressed genes showing  $\log_2$  fold-change  $>1$  or  $<-1$  and  $\text{padj} < 0.01$  as an input.

**Table S5** Differentially expressed transcripts in germinating wild type and *Mpgun1* mutant spores. Differential expression analyses were carried out using DESeq2 (Love *et al.*, 2014). Functional annotations for MpTak\_v5.1 genome release were used to annotate differentially expressed genes ( $\log_2$  fold-change  $>1$  or  $<-1$  and  $\text{padj} < 0.01$ ).

**Notes S1** Sequence maps of plasmids used for complementation of the *Arabidopsis gun1* mutant (Genbank format).

**Methods S1** *Agrobacterium*-mediated transformation of the liverwort *M. polymorpha*

**Methods S2** Generation of transgenic *Mpgun1* CRISPR/Cas9 knock-out lines.

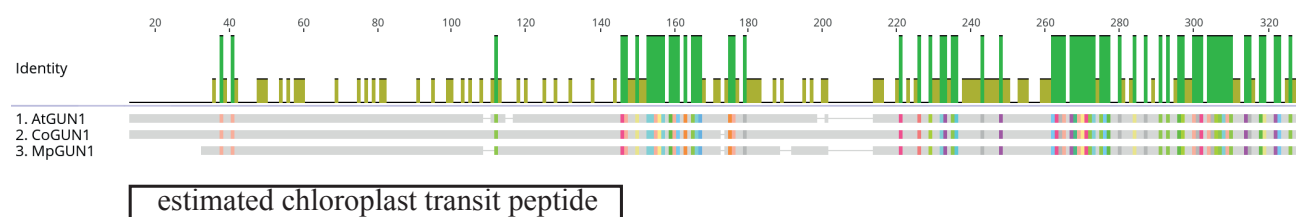

**Fig. S1** Identification of GUN1 chloroplast transit peptide containing region. AtGUN1, MpGUN1 and CoGUN1 protein sequences were aligned using MAFFT and visualised with Geneious to identify non-aligning N-terminal region that contains a chloroplast transit peptide sequence. Constructs for complementation of *Atgun1* mutant were cloned so that the promoter and estimated chloroplast transit peptide encoding region were from AtGUN1, whereas the rest of the coding sequence was either from MpGUN1 or CoGUN1.

Numbers indicate amino acid position in the alignment, green bars indicate 100 % amino acid conservation between the three sequences.

Table with columns: 1. Gene name (e.g., BRCA1, TP53), 2. Chromosome (e.g., 17q21.31, 17p13.1), 3. Coordinates (e.g., 43,043,913-43,045,611, 43,045,611-43,046,683), 4. RefSeq ID (e.g., NG\_015933.1, NG\_015934.1), 5. Gene length (e.g., 16,998, 11,072). The table contains genomic data for numerous genes.

Table with columns: 1. Gene name, 2. Chromosome, 3. Coordinates, 4. RefSeq ID, 5. Gene length. This table continues the list of genes from the previous section.

Table with columns: 1. Gene name, 2. Chromosome, 3. Coordinates, 4. RefSeq ID, 5. Gene length. This table continues the list of genes.

Table with columns: 1. Gene name, 2. Chromosome, 3. Coordinates, 4. RefSeq ID, 5. Gene length. This table continues the list of genes.

Table with columns: 1. Gene name, 2. Chromosome, 3. Coordinates, 4. RefSeq ID, 5. Gene length. This table continues the list of genes.

**Fig. S2** Multiple sequence alignment of 76 GUN1 protein sequences from diverse streptophyte algae and land plants. The alignment was constructed using MAFFT and visualised with Geneious. Darker shading indicates higher similarity to the consensus. Below the alignment, the annotation tracks show helix-turn-helix motifs (grey arrows) and SMR domain (red arrow) predicted by Alphafold and PPR motifs (brown arrows) predicted by hmmsearch using a P-type PPR motif HMM. Dark brown motifs have higher confidence. The final PPR motif is interrupted by a long insertion but Alphafold predicts that the N- and C-terminal helices nevertheless interact together as in a typical PPR motif. The HMM profile and full alignment of all 893 identified GUN1 sequences are obtainable from Dryad (<https://doi.org/10.5061/dryad.x0k6djhmk>).

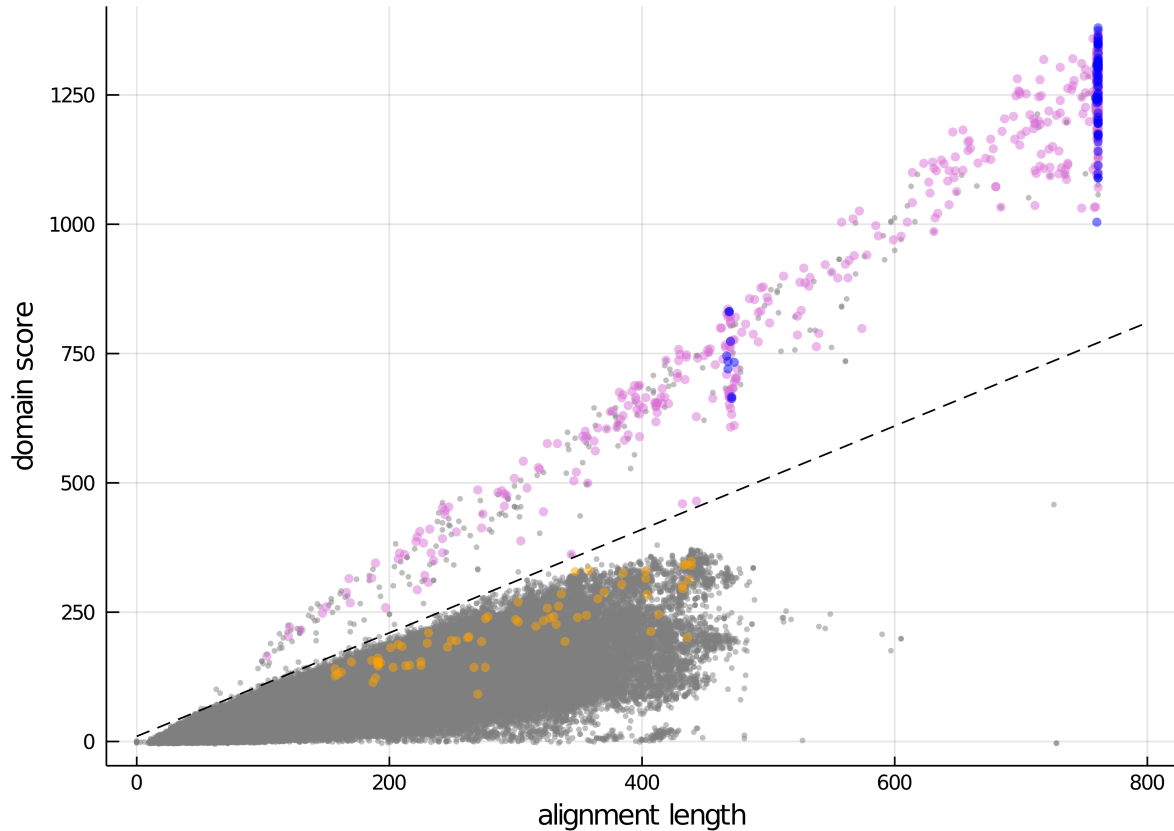

**Fig. S3** Identification of GUN1 sequences by hmmsearch scores. 554,837 PPR sequences translated from the 1KP transcriptome dataset were searched with a GUN1-specific hidden Markov model profile using hmmsearch. The maximum domain score for each protein is plotted against the alignment length. The blue points represent the score of the 76 GUN1 sequences used to construct the GUN1 profile, so can be considered as positive controls. The pink and orange points represent the highest-scoring alignment in each species in the 1KP dataset. The smaller grey points represent all other alignments, the bulk of which would not be expected to be GUN1 but rather other PPR proteins. The dashed line was drawn to separate these assumed non-GUN1 sequences from the known GUN1 sequences; points lying above this line are assumed to represent GUN1 sequences. The code and source data for reproducing figure S3 are obtainable from Dryad (<https://doi.org/10.5061/dryad.x0k6djhmk>).

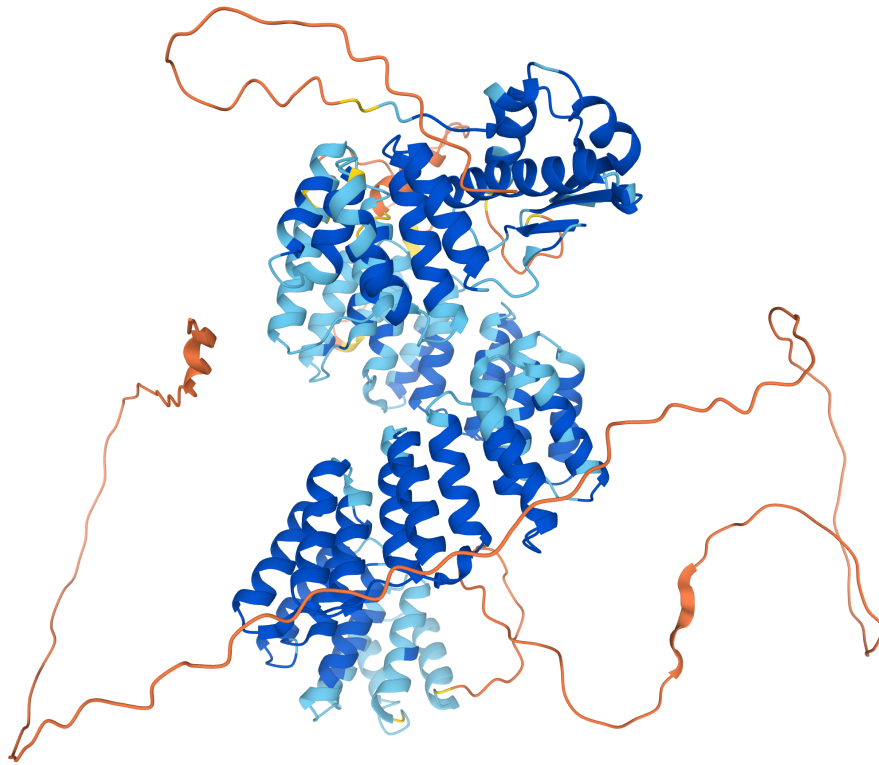

**Fig. S4** *A. thaliana* GUN1 (AT2G31400) protein structure predicted by AlphaFold (Jumper *et al.*, 2021; Varadi *et al.*, 2022). AlphaFold predicts 16 helix-turn-helix motifs of which 12 are recognised as PPR motifs by hmmsearch with a P-type PPR HMM (Cheng *et al.*, 2016). The final PPR motif is interrupted by a long insertion but AlphaFold predicts that the N- and C-terminal helices nevertheless interact together as in a typical PPR motif.

```

>Mpgun1-1 line 1
GTCACCTCGGTACTGGGGAGCTTGGGAGAGGCTTTGAAAAGTTTCAGATGGATGTTGAGGCAGGCGCGGCTCAGCGGTGAGTGGAGTAAGCTCGCGAGCATTATGATC
AGCACTCTGGGACGACTGGGAAAAGGTGGATCTTGCCAGGAAGTGTTCACAAACGCGCAATCC_317bp_deletion_TGCAGCGCGGTGGCATTGAACAGGACATTTACATAC
TTCACATACAACACTTTGATAGACGCGCTGTGAAGGGGGCCAGATGGAGTTGGCCGCATCGATCGTAGCAGCCATGCGACACAAGTCAATAAACCCGAACGTTGTGCA
CTTACAGCACTATGATTGATGGCTACGGCAAATTTGGCTGTTGATTCAGGCTAAA

>Mogun1-1 line 2
GTGACTCGGTACTGGGGAGCTTGGGAGAGGCTTTGAAAAGTTTCAGATGGATGTTGAGGCAGGCGCGGCTCAGCGGTGAGTGGAGTAAGCTCGCGAGCATTATGATC
AGCACTCTGGGACGACTGGGAAAAGGTGGATCTTGCCAGGAAGTGTTCACAAACGCGCAATCC_317bp_deletion_CCGTGGCATTGAACAGGACATTTTACATAC
AACACTTTTATAGACGCGCTGTGAAGGGGGCCAGATGGAGTTGGCCGCATCGATCGTAGCAGCCATGCGACACAAGTCAATAAACCCGAACGTTGTGACTTACAGC
ACTATGATTGATGGCTACGGCAAATTTGGCTGTGTAATCAAGGCTAAA

>Mpgun1-1 line 3
GCTCAGCTCGGTACTGGGGAGCTTGGGAGAAGGCTTTGAAAAGTTTCAGATGGATGTTGAGGCAGGCGCGGCTCAGCGGTGAGTGGAGTAAGCTCGCGAGCATTAT
GATCAGCACTCTGGGACGACTGGGAAAAGGTGGATCTTGCCAGGAAGTGTTCACAAACGCGCAATC_326bp_deletion_ATTGAACAGGACATTTTACATACAACAC
TTTTGATAGACGCGCTGTGAAGGGGGCCAGATGGAGTTGGCCGCATCGATCGTAGCAGCCATGCGACACAAGTCAATAAACCCGAACGTTGTGACTTACAGCACTAT
GATTGATGGCTACGGCAAATTTGGCTGTTGAAATCAGGCTAAA

>Mpgun1-1 line 4
GTCGCTCGGTACTGGGGAGCTTGGGAGAGGCTTTGAAAAGTTTCAGATGGATGTTGAGGCAGGCGCGGCTCAGCGGTGAGTGGAGTAAGCTCGCGAGCATTATGAT
CAGCACTCTGGGACGACTGGGAAAAGGTGGATCTTGCCAGGAAGTGTTCACAAACGCGCAATCATTGT_306bp_deletion_TGCATTGAACAGGACATTGAACAGGA
CATTTTACATACAACACTTTTATAGACGCGCTGTGAAGGGGGCCAGATGGAGTTGGCCGCATCGATCGTAGCAGCCATGCGACACAAGTCAATAAACCCGAACGTT
GTCACCTTACAGCACTATGATTGATGGCTACGGCAAATTTGGCTTTGAAATCAGGCGAATG

>Mpgun1-2 line 1
AATTTTNGGGAAANCCCAANNGGANAGGGNNTTGAACCCGGGCCNCCNNAACCCCTTAATTTTTGATTNGCCATTTNCCANCCNGGGCCATTTTTGGNGGA
GTTCCCAAAAAGGTTTTGCTGAAAATGCAGGGCCNNGGCTTGAACCCGGNCTTTTTNCCCTACAACNNTTTGATAGAACCCCGTNGTAAGGGGGCCNGATGG
AGTTGGCCGCATCGATTGTAGCAGCCATNGGACACAAGTCAATAAACCCGAAACGTTGTCACTTACAGCACTATGATTGATGGCTACGGCAAATTTGGCTGTTTATGATCA
GGCCATCAATTTATACCAGAAATGAAAGACGCAACATATATCCTGATCGAGTTTCTTACAACACTTTAGTCGACATTTATGCGAAGCTTGGGAGATTTGACGATGCTCT
CGCCACCTGCAGTAAATGGAGAGGCGCGCTTGAACCCGACGCTAGTCACGTACAACGCCCTCATAGATGCATATGGCAAACAGGGCAAATACGACGATGCATCAA
ATTGTTGACAAGATGAAATCAGAAGGCGTCTGTTCCGAATGTTGACCTACTCTGCTCTGATAGATGCGTATTCTAAGGGTGGCCGACACAGAGAA_610bp_deletion
_CCCAGAAGCCGAGGGTCCCGCTGCAACAATGAATTGATAGCTATTGGAAGGCAACCTGTGGATGAATCATGCATCCCTGATAGTGCATAAGGGCAAGCATGGA
AACATTTGGCAGCTGTGAAAATCTCCACGATGCAAGGATCGGGATTAACCCAAACGCTCGTGACGTTCTCAGCTATTTTGAACGCATGCAAGGTGCGCACTGTGT
CCATGTTTACCAGTATTTCCCATGCTGTGGTATTGCTTTACTTACTCTCAGTATATGTTGAGGCAGGATCATCGACTCTCACTAAAAGTAGACAATTTTATTTCCCAT
CGTATACACCAGAGGGCTAGTCAAGCAGTGTGTTGAAACGTTGATCGTGAACGTTGGCCATTTATCATATTTAAAGGGCATTGCTTGTGACTGAGGAACGAAACGCTCTGTTAGAGTGA
TACTGCCTTTTTTCTGTTATCAGTTGAGGCTTCTATCTAGTTGACTTCTATATTAATGAAGCATATGGGTGTTTTTGAACAGTCCGTTTTCGAAGAGGCTTCCG
TCTTTTGGAGGAGATGAGACTTTTTGATAGCAGGGTCTACGGCGTTCATACGGATGCTGATGGGTTACCGCGAGCATGTTGGGGGGAAGCTGAGGTTCTCTTCA
ACCAATTTGCCTTACGACTACGCCACTGACGACGCTTCTACAATGCCTTGACGGATGCTTGGCANTNNATNNGG

>Mpgun1-2 line 2
CNCCGGGGCCGTTTTTTGGGGGGNNTGCGAAAAGTTTTGTTGAAATGCAGGGCCNNGCCCTTGAACCCAGGACATTTNNNTTACAACACTTTGATTGACGCGG
TCTGTAAGGGGGGCCAGATGGAGTTGGCCGCATCGATCGTAGCAGCCATGCGANCCAAGTCAATAAACCCGAACGTTGTCACTTACAGCACTATGATTGATGGCTAC
GGCAAATTTGGCTGTTTTGATCAGGCCATCAATTTATACCACGAAATGAAAGACGCCAACATATATCTGATCGAGTTTCTTACAACACTTTAGTCGACATTTATGCGAAGC
TTGGGAGATTTGACGATGCTCTGCCACCTGCAGTAAATGGAGAGGGCCGCTGGAACCCGACGATGTCAGTACACGCGCCCTATAGATGCATATGGCAAACAGG
GCAAATACGACGATGCATCAATTTGTTGACAAAGATGAAATCAGAAGGCGTGTCCGAATGTTGACCTACTCTGCTCTGATAGATGCGTATTCTAAGGGTGGCCGA
CACAGAGAAGC_668bp_deletion_ATGATGAATCATGCATCCCTGTAGATCGCAATAAGGGCAAGCATGGAACATTTTGGCAGCTGTGAAAATCTTCCACGATATGCA
GGAGTCCGGATTAACCCAAACGTCGTGACGTTCTCAGCTATTTTGAACGCATGCAAGGTGCGCACTGTGTTCCATGTTTACCAGTATTTTCCCATGCTGTGGTATTGCT
TTTACTTACTCAGTATATGTTGAGGCAGGATCATCGACTCTCACTAAAAGTAGACAATTTTATTTCCCATCGTATACACCACGAGGGCTAGTCAAGCAGTATTGCTG
GAACGTTGGGCAATTTATCATATTTTAAAGGGCATTGCTTGTGACTGAGGAACGAAACGCTTGTGTAAGAGTGAAGATACTGCGTTTTTTCTGTTATCAGTTGAGGCTTCTATCT
AGTTGACTCCTATATTAATGAAGCATATGGGTCGTTTTTGCAGTCTGCTGTCGCTTTTCAAGAGGCTTCCGCTTTTTTGGAGGAGATGAGACTTTTTGATAGCAGGCT
CTAGGGCTTGCATACGATGCTGATGGGTTACGCGAGCATGTTGGGGGGAAGCTGAGGTTCTTCAACCAAATTTGCCCTCATGACTACGCCACTGACGACGAGC
CTTCTACAATGCCTTACGAGTATCTTGGCANTNNATNNGG

```

**Fig. S5** Location of DNA deletions in *Mpgun1-1* and *Mpgun1-2* CRISPR lines. Sanger sequencing reads that span across the deletion sites in selected mutant lines. The location and size of the deletion in each sequence is shown in red, as is the location of the first in frame stop codon after the deletion site.



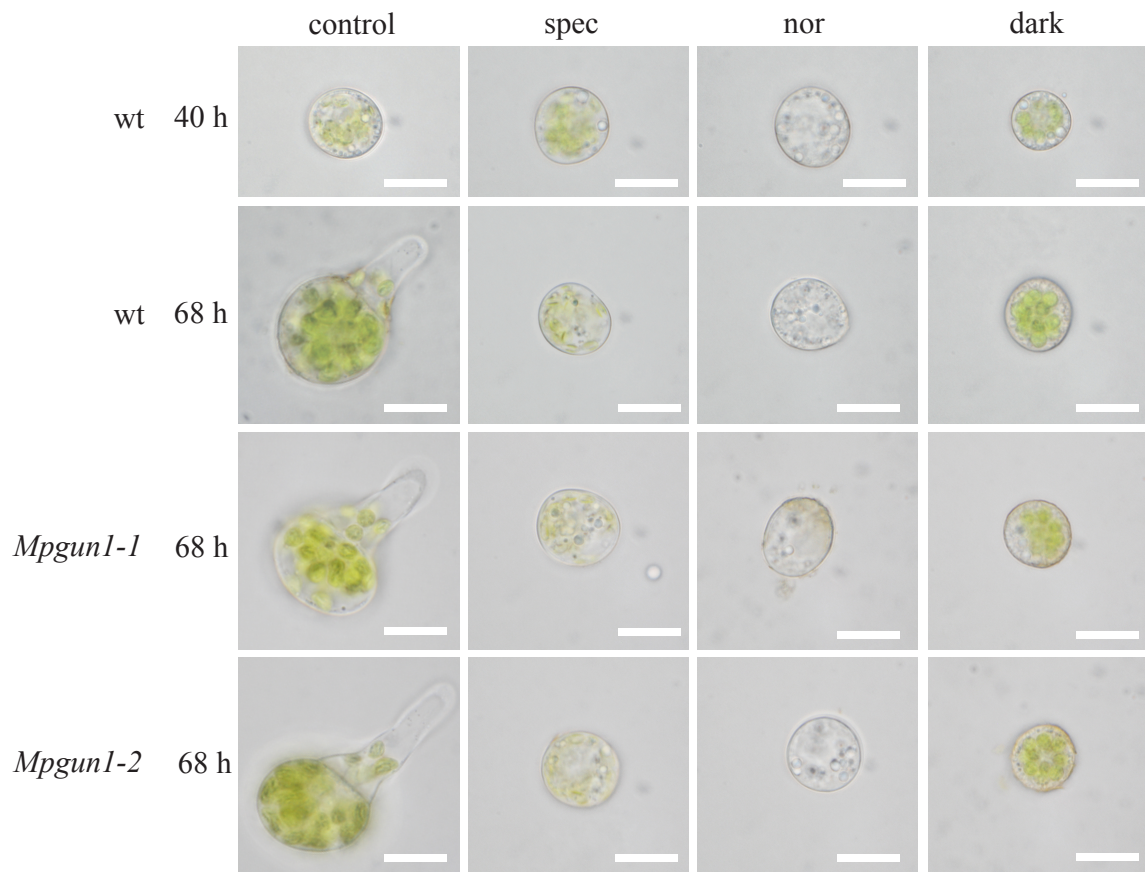

**Fig. S6** Phenotype of wild-type and *gun1* mutant *M. polymorpha* spores germinated under long day conditions in the absence (control) or presence of chemical inhibitors of plastid function (spec= spectinomycin 500  $\mu\text{g}/\text{ml}$  or nor= norflurazon 5  $\mu\text{M}$ ) or in complete darkness. Scale bar 20  $\mu\text{m}$ .

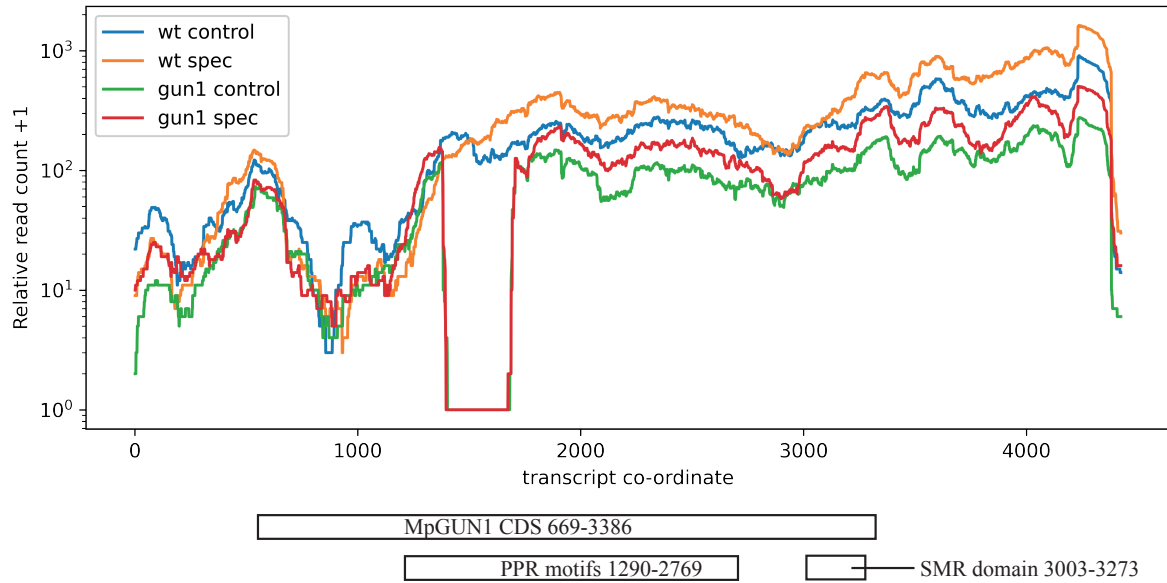

**Fig. S7** Read coverage across the *MpGUN1* transcript in *M. polymorpha* spore transcriptome data. Reads from three biological replicate transcriptomes for each condition were pooled together and mapped against the *MpGUN1* transcript. The lines illustrate  $\text{Log}^2$  read count + 1 for each nucleotide position along the transcript. The location of the CRISPR induced DNA deletion in *gun1* mutant spores can be seen as complete lack of read coverage on that region. Location of the *MpGUN1* coding sequence (CDS), pentatricopeptide repeat (PPR) motifs and the small MutS-related (SMR) domain are indicated below the chart.

### **Methods S1 *Agrobacterium*-mediated transformation of the liverwort *M. polymorpha***

This protocol is described in more detail in Honkanen and Jones, 2020. To obtain *M. polymorpha* spores male and female plants were grown on soil at 22 °C under 16 hours light: 8 hours dark photoperiod supplemented with far-red light and crossed as described in (Chiyoda *et al.*, 2008). 2-7 intact or burst mature sporangiums were collected in each Eppendorf tube and the opening of the tube covered with a Sun Cap Closure 18 mm (Sigma) or micropore tape. To dry the spores the tubes were first placed lids open in an air-tight container containing silica gel for 10 days and then stored at -80 °C. Before use the spores were briefly defrosted at room temperature and sterilised in 0.1 % sodium dichloroisocyanurate (Sigma) solution for 5 minutes. The spores were collected by centrifugation at 13,000 rpm for 1.5 minutes, after which the sterilisation solution was discarded, and spores resuspended in distilled H<sub>2</sub>O (100 µl per sporangium). Liquid spore cultures were prepared in 6 well plates (Sarstedt) using 6 ml sterile ½ Gamborgs medium (for 500 ml media: 0.8 g ½ Gamborgs medium powder (Duchefa Biochemie), 10 g sucrose, 150 ml L-glutamine (Sigma), 250 mg MES buffer (Sigma), pH to 5.6 using KOH) in each well. 100 µl sterilised spore solution was placed in each well and the plate was sealed with micropore tape. Spores were grown in a growth cabinet for 7 days at 22 °C constant light at 80 µE.m<sup>-2</sup>.s<sup>-1</sup> without shaking. *Agrobacterium* GV3101 liquid cultures transformed with the relevant plant transformation vectors were inoculated from single colonies into 5 ml LB medium cultures containing the relevant antibiotics and grown for 2 days at 28 °C 200 rpm on a shaker. The bacterial cultures were centrifuged 15 minutes at 2000 g, after which the supernatant was discarded and bacterial pellet resuspended in 10 ml fresh ½ Gamborgs medium containing 100 µM acetosyringone. The *Agrobacterium* cultures were induced by growing for 4 hours at 28 °C 200 rpm on a shaker. 100 µl of induced bacterial culture was added into each 6 ml spore culture and acetosyringone was added to final concentration of 100 µM. Spores were co-cultivated with *agrobacterium* for 1-3 days at 22 °C under 16 hours light 8 hours dark photoperiod or under constant light at 80 µE.m<sup>-2</sup>.s<sup>-1</sup> on a 120 rpm shaker. To remove the *agrobacteria* the spore culture was collected using a sterile plastic Pasteur pipette (Thermo Fisher), transferred onto a 40 µm nylon mesh cell strainer (Fisher Scientific) placed in the opening of a 50 ml falcon tube and rinsed with 50 ml sterile distilled H<sub>2</sub>O. The spores were then plated on plates containing sterile ½ Gamborgs medium pH 5.6 supplemented with 1 % (w/v) sucrose and 1.4 % (w/v) agar (Sigma) and appropriate antibiotics (always 100 µg/ml Cef to kill the *agrobacterium*, in addition 10µg/ml Hyg or 0.5 µM chlorosulfuron to select for transformant plants). Plates were placed in a growth chamber at 22 °C, under constant light or 16 hours light 8 hours dark photoperiod. After 1-2 weeks antibiotic resistant transformant plants were visible.

### **Methods S2 Generation of transgenic *Mpgun1* CRISPR/Cas9 knock-out lines**

*M. polymorpha* CRISPR/Cas9 knock-out lines were generated as described in (Sugano *et al.*, 2018). A new sgRNA construct pHB453 that allows the use of two sgRNAs that specify two adjacent CRISPR/Cas9 cut sites was kindly provided by Dr Holger Breuninger, University of Tübingen. The design of pHB453 is based on pMpGE\_En03 (Sugano *et al.*, 2018, Addgene plasmid #71535), with a second propU6-sgRNA fragment introduced between the *att* sites. The first sgRNA was introduced into the *Bpil* site of pHB453 using primers MpGUN1\_CRISPR\_1-1 F and R for the *Mpgun1-1* construct and MpGUN1\_CRISPR\_2-1 F and R for the *Mpgun1-2* construct. The second sgRNA was introduced into the *BsmBI* site of

pHB453 using primers MpGUN1\_CRISPR\_1-2 F and R for the *Mpgun1-1* construct and MpGUN1\_CRISPR\_2-2 F and R for the *Mpgun1-2* construct. The resulting entry vectors were sequence-verified by Sanger sequencing, after which the plasmids were recombined with the destination vector pMpGE011 (Sugano *et al.*, 2018) using Gateway LR clonase (Invitrogen).

*M. polymorpha* transformation with the binary vectors described above was carried out using *Agrobacterium* (strain GV3101) as described in Methods S1. Genotyping of *Mpgun1-1* and *Mpgun1-2* CRISPR knock-out lines was carried out using the Phire plant direct PCR kit (Thermo Fisher) as recommended by the manufacturer with primers amplifying across the predicted deletion site (MpGUN1\_F1 and MpGUN1\_R1 for *Mpgun1-1*, MpGUN1\_F2 and MpGUN1\_R2 for *Mpgun1-2*). The positive lines identified were propagated through gemmae and re-genotyped to obtain stable non-chimeric knock-out lines. The genotyping PCR products were Sanger-sequenced at Macrogen, South Korea to identify lines where the CRISPR deletion resulted in a premature stop codon. Selected T0 plants for each mutant line (*Mpgun1-1* or *Mpgun1-2*) were crossed together to obtain a non-segregating T1 population of knock-out mutant spores. T1 or T2 spores were used for phenotype assessment and gene expression analyses. The spores were re-genotyped after each experiment to confirm the absence of wild-type *GUN1* DNA.

#### References:

**Carpenter EJ, Matasci N, Ayyampalayam S, Wu S, Sun J, Yu J, Jimenez Vieira FR, Bowler C, Dorrell RG, Gitzendanner MA, et al. 2019.** Access to RNA-sequencing data from 1,173 plant species: The 1000 Plant transcriptomes initiative (1KP). *GigaScience* **8**.

**Cheng S, Gutmann B, Zhong X, Ye Y, Fisher MF, Bai F, Castleden I, Song Y, Song B, Huang J, et al. 2016.** Redefining the structural motifs that determine RNA binding and RNA editing by pentatricopeptide repeat proteins in land plants. *The Plant journal: for cell and molecular biology* **85**: 532–547.

**Chiyoda S, Ishizaki K, Kataoka H, Yamato KT, Kohchi T. 2008.** Direct transformation of the liverwort *Marchantia polymorpha* L. by particle bombardment using immature thalli developing from spores. *Plant cell reports* **27**: 1467–1473.

**Gutmann B, Royan S, Schallenberg-Rüdinger M, Lenz H, Castleden IR, McDowell R, Vacher MA, Tonti-Filippini J, Bond CS, Knoop V, et al. 2020.** The Expansion and Diversification of Pentatricopeptide Repeat RNA-Editing Factors in Plants. *Molecular plant* **13**: 215–230.

**Jumper J, Evans R, Pritzel A, Green T, Figurnov M, Ronneberger O, Tunyasuvunakool K, Bates R, Žídek A, Potapenko A, et al. 2021.** Highly accurate protein structure prediction with AlphaFold. *Nature* **596**: 583–589.

**Leebens-Mack JH, Barker MS, Carpenter EJ, Deyholos MK, Gitzendanner MA, Graham SW, Grosse I, Li Z, Melkonian M, Mirarab S, et al. 2019.** One thousand plant transcriptomes and the phylogenomics of green plants. *Nature*: 1–20.

**Love MI, Huber W, Anders S. 2014.** Moderated estimation of fold change and dispersion for RNA-seq data with DESeq2. *Genome biology* **15**: 550.

**Sugano SS, Nishihama R, Shirakawa M, Takagi J, Matsuda Y, Ishida S, Shimada T, Hara-Nishimura I, Osakabe K, Kohchi T. 2018.** Efficient CRISPR/Cas9-based genome editing and its application to conditional genetic analysis in *Marchantia polymorpha*. *PLoS one* **13**: e0205117-22.

**Van Bel M, Diels T, Vancaester E, Kreft L, Botzki A, Van de Peer Y, Coppens F, Vandepoele K. 2018.** PLAZA 4.0: an integrative resource for functional, evolutionary and comparative plant genomics. *Nucleic acids research* **46**: D1190–D1196.

**Varadi M, Anyango S, Deshpande M, Nair S, Natassia C, Yordanova G, Yuan D, Stroe O, Wood G, Laydon A, et al. 2022.** AlphaFold Protein Structure Database: massively expanding the structural coverage of protein-sequence space with high-accuracy models. *Nucleic acids research* **50**: D439–D444.
